# Supplementary material
Source: publisher site journal article supplement (https://www.spandidos-publications.com/8705/downloadSupplementary)
Supplement: Supplementary file 1 [file downloadSupplementary]

Table SI. Preparation of the astragaloside IV standard curve for the vanillin-sulfuric acid colorimetric method.

| Standard | Dilution                     | Concentration, mg/ml | Absorbance (560 nm) |
|----------|------------------------------|----------------------|---------------------|
| (1)      | Stock solution (no dilution) | 15.0000              | 0.9991±0.0181       |
| (2)      | 50 µl (1) + 50 µl methanol   | 7.5000               | 0.643±0.0036        |
| (3)      | 50 µl (2) + 50 µl methanol   | 3.7500               | 0.4523±0.0036       |
| (4)      | 50 µl (3) + 50 µl methanol   | 1.8750               | 0.2861±0.0021       |
| (5)      | 50 µl (4) + 50 µl methanol   | 0.9375               | 0.2063±0.0013       |
| Blank    | Methanol only                | 0.0000               | 0.1200±0.0008       |

Table SII. Determination of astragaloside IV in BYHWD by vanillin-sulfuric acid colorimetric method.

| Standard         | Concentration, mg/ml | Absorbance (560 nm) |
|------------------|----------------------|---------------------|
| BYHWD glycosides | 11.1                 | 0.5040±0.0059       |
| Blank            | 0.0                  | 0.1445±0.0018       |

BYHWD, Buyang Huanwu Decoction.
